# Supplementary material
Source: Preprints.org preprint supplement (doi:10.20944/preprints202003.0191.v1)

Supplementary Figure 1

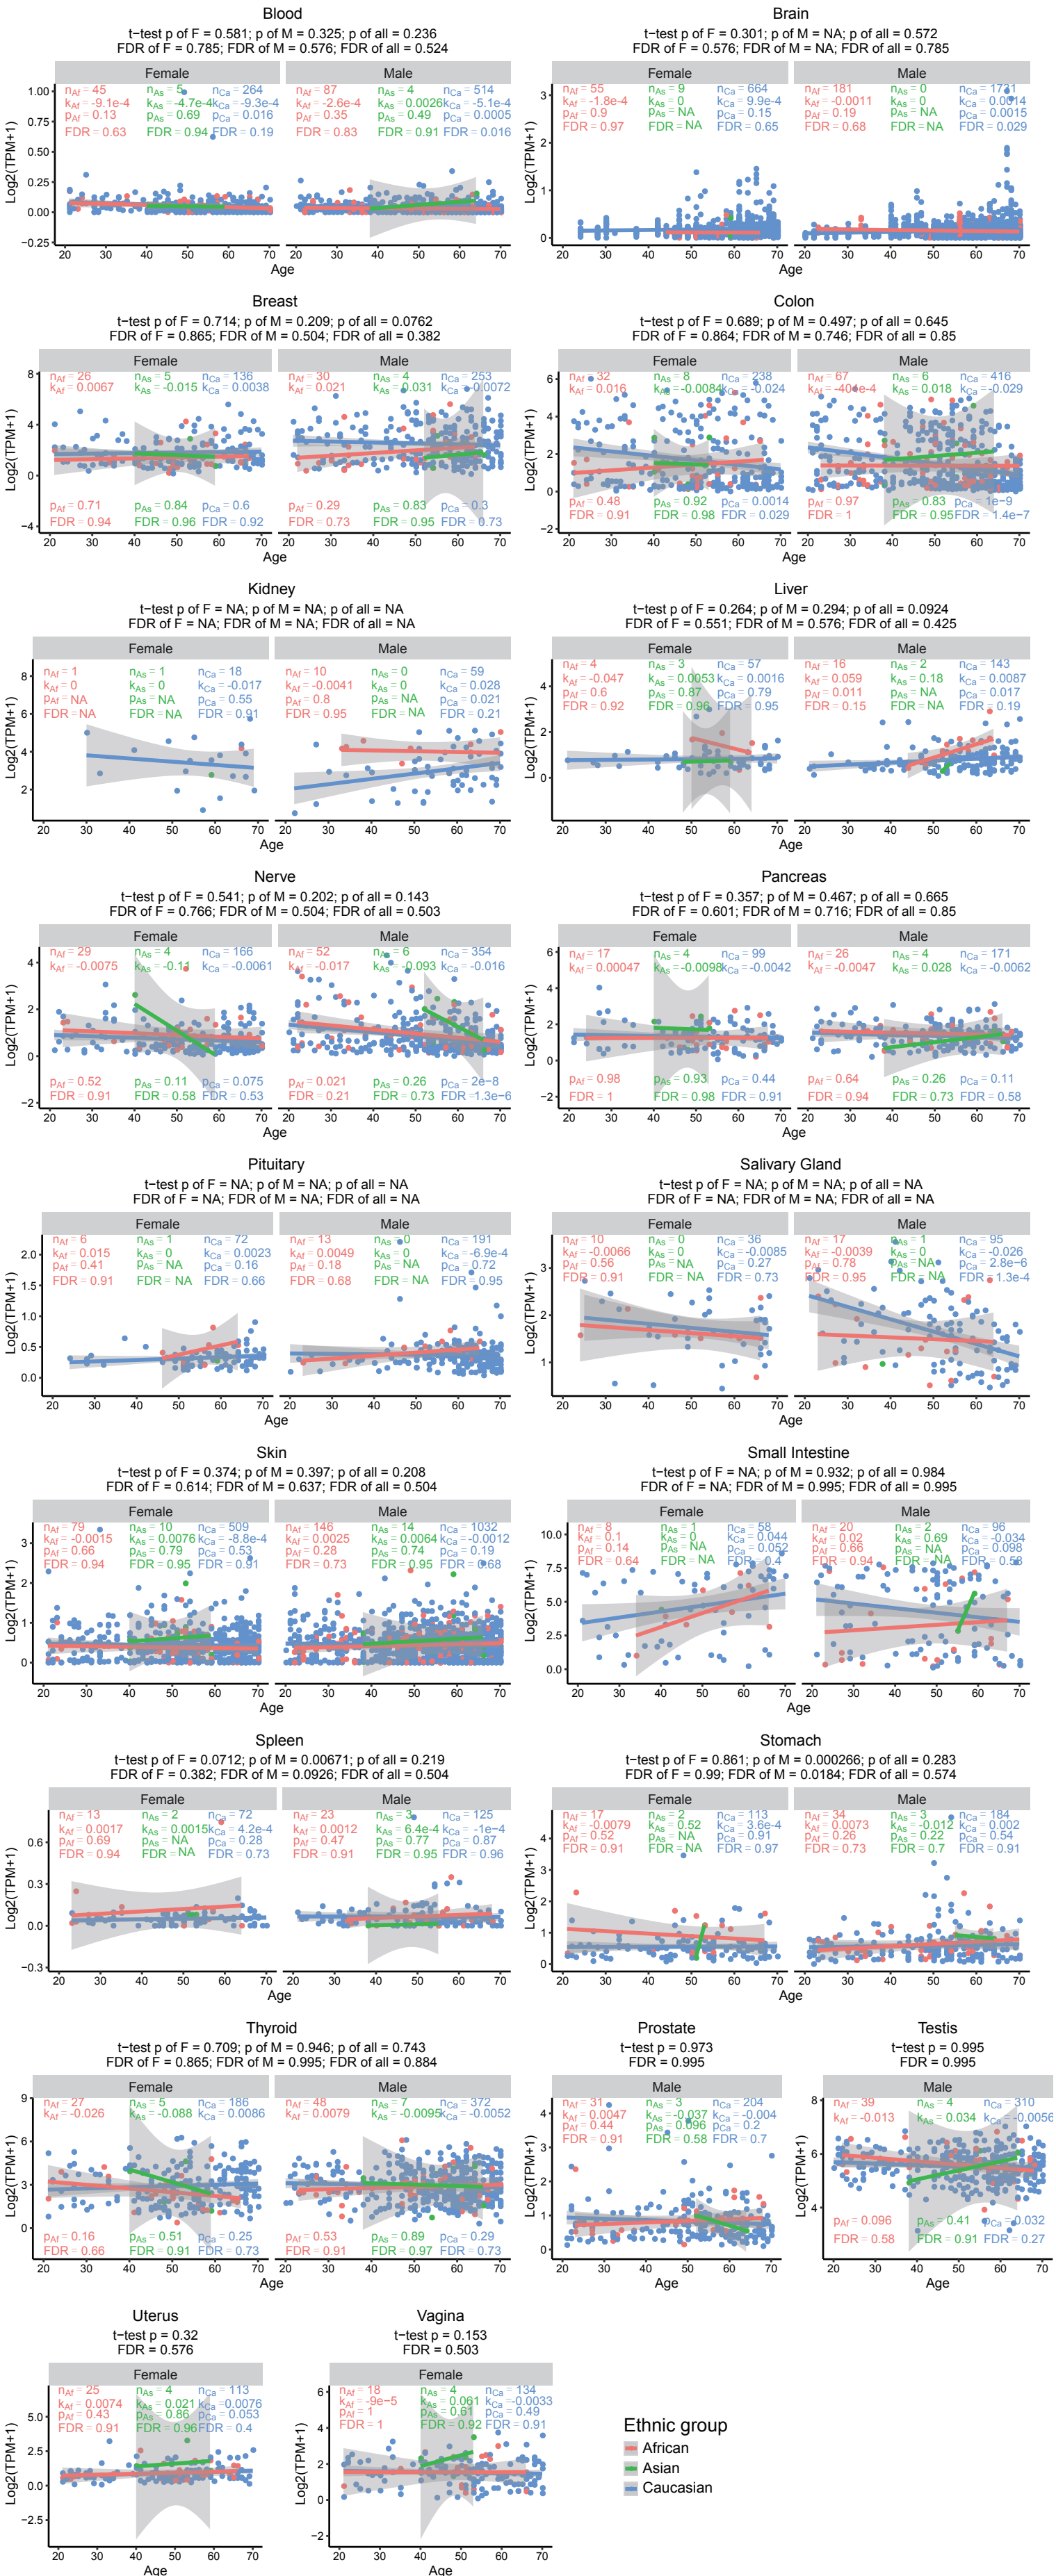

Supplementary Figure 2

a

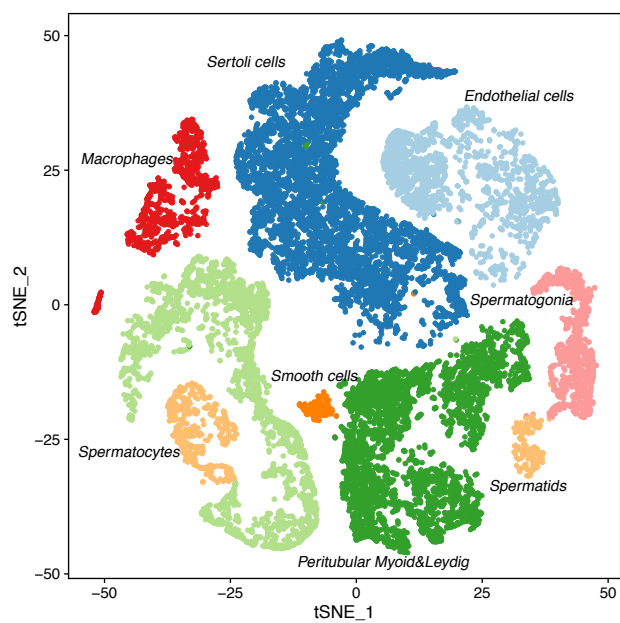

b

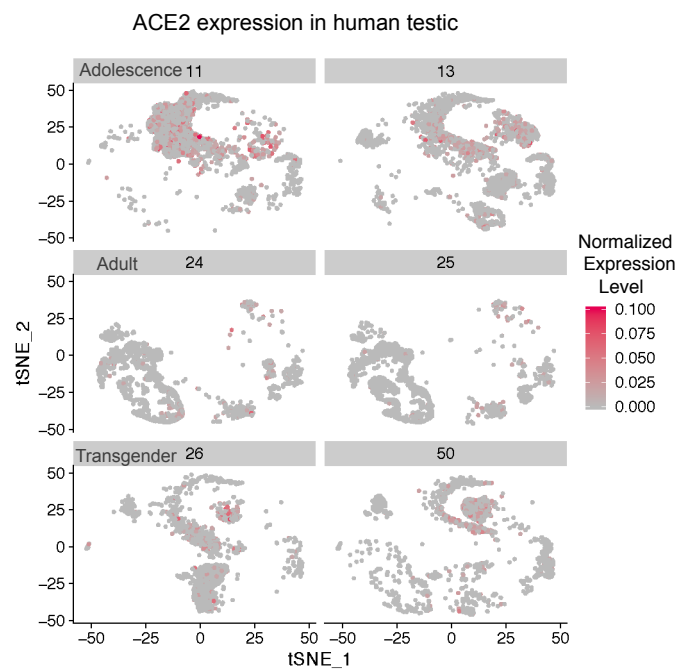

Supplementary Figure 3

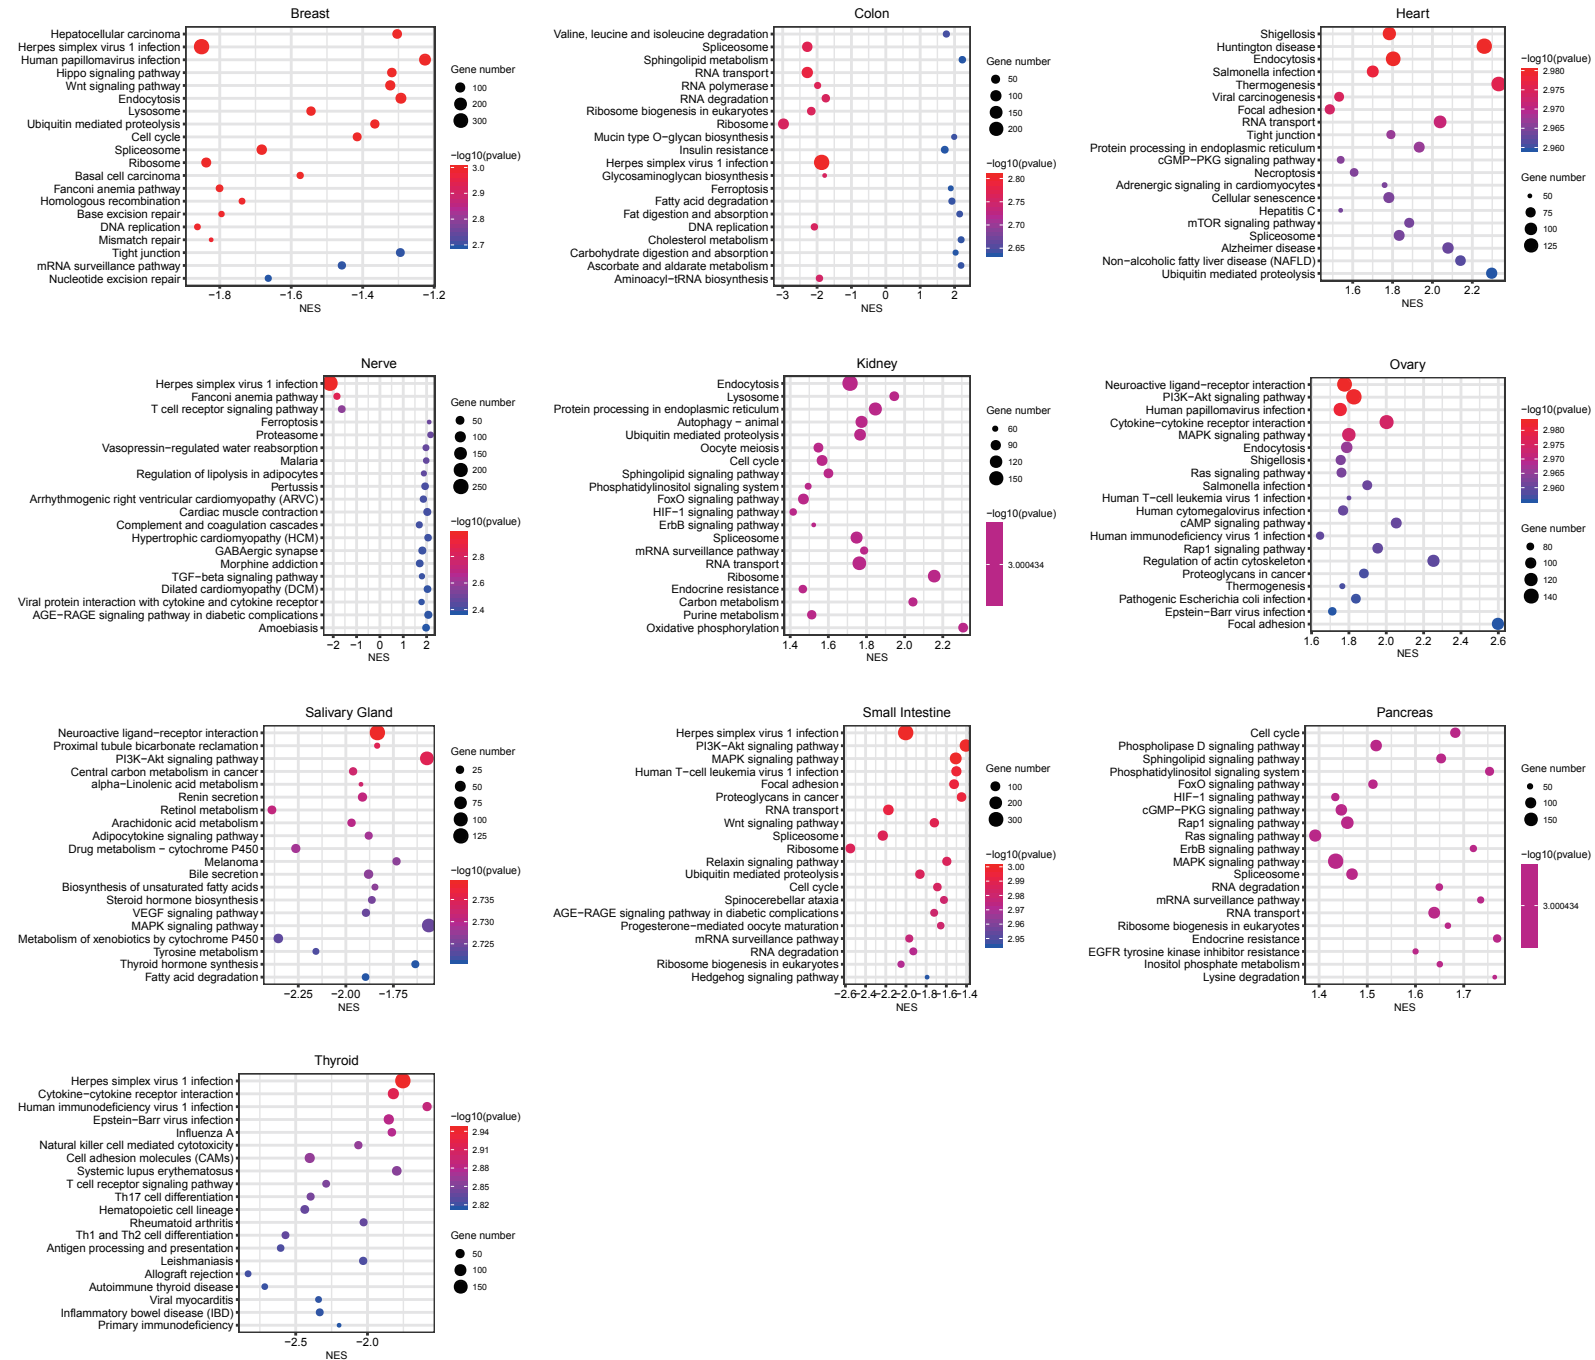

Supplementary Figure 4

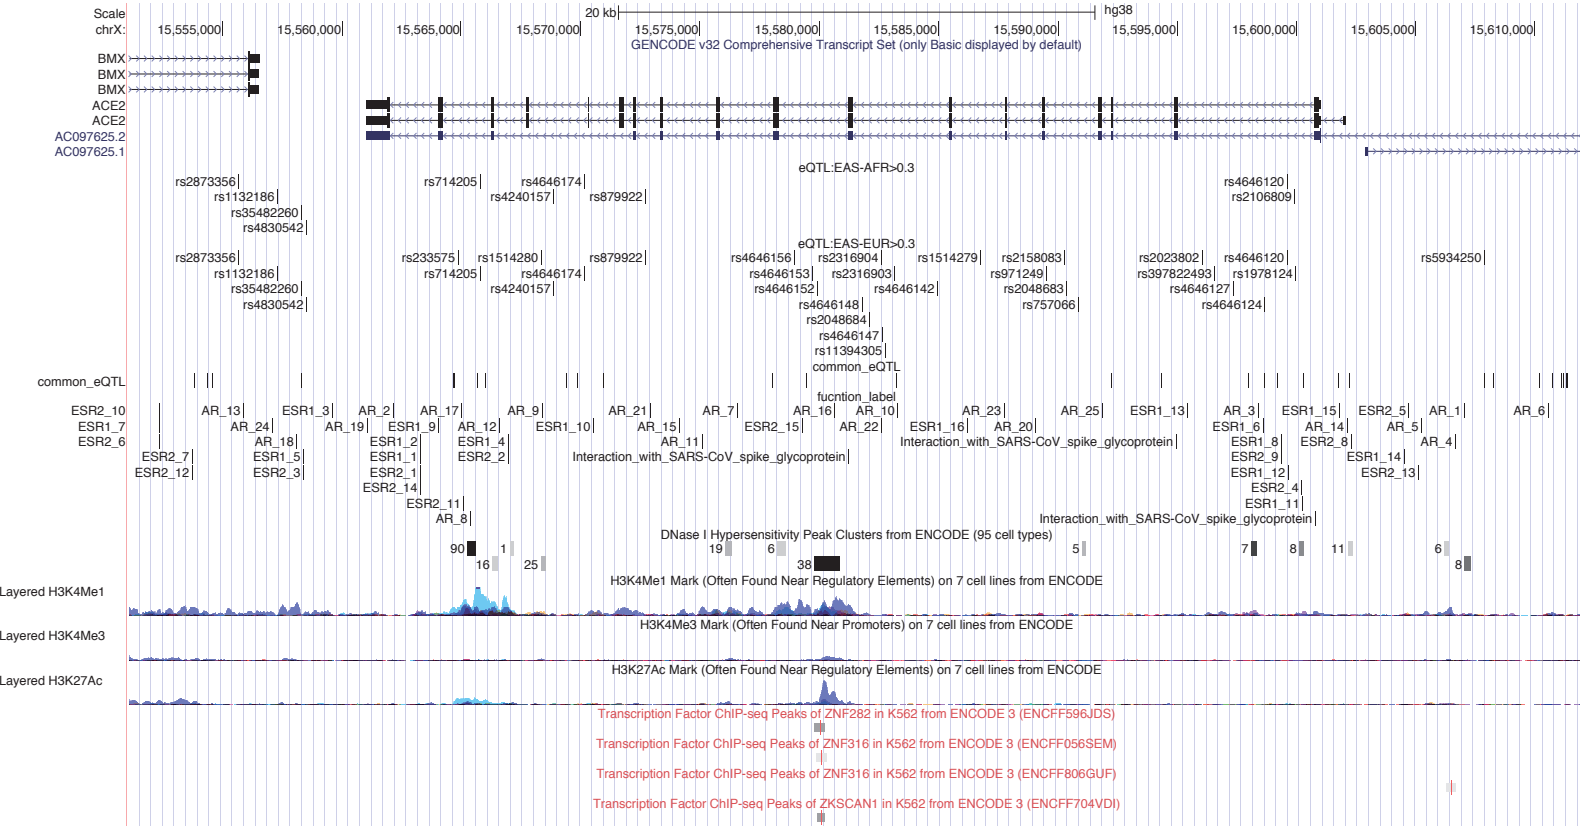



Supplementary Figure 5

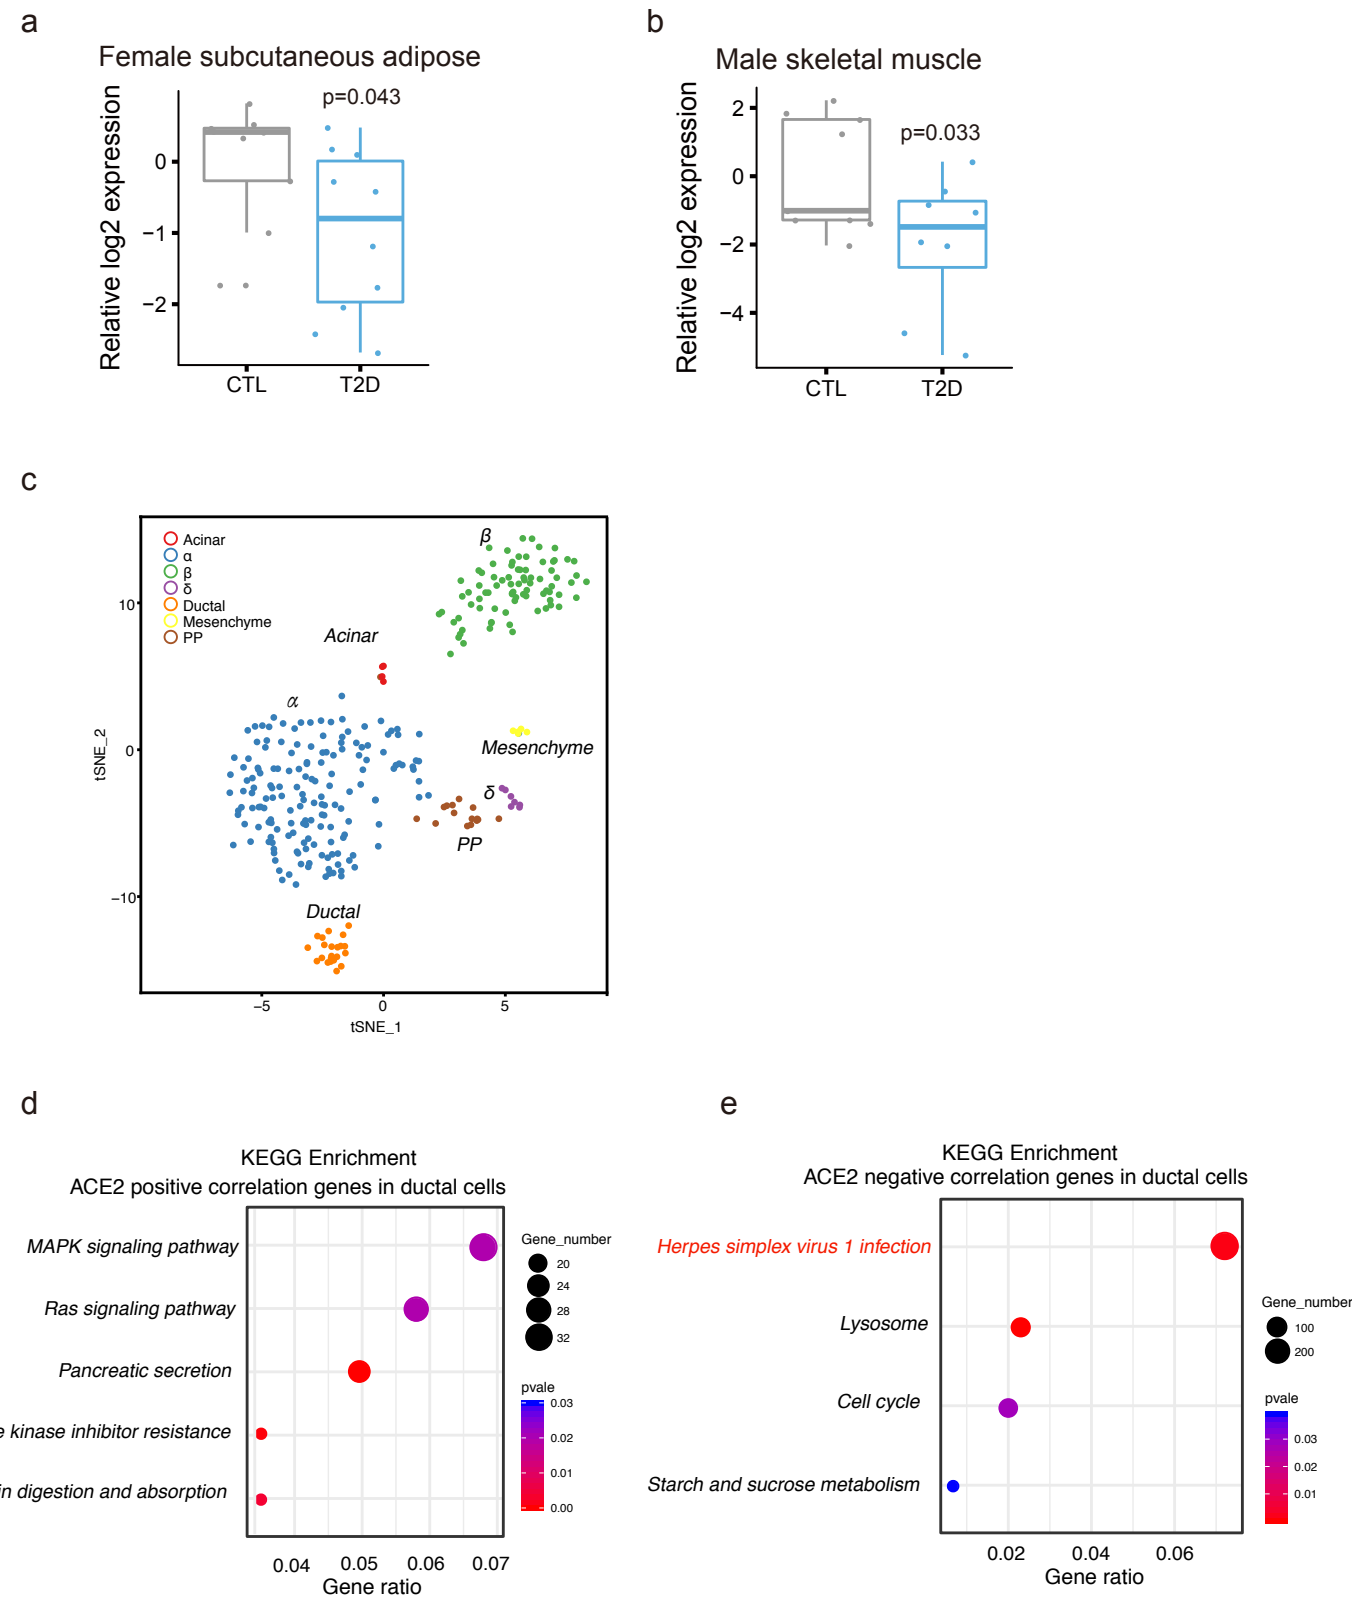

Supplement: Supplementary file 1 [file supplementary]
