# Supplementary material
Source: Preprints.org preprint supplement (doi:10.20944/preprints202003.0191.v1)
Supplement: Supplementary file 2 [file supplementary]

Archive with 2 entries (2 files):
- SupFigs.pdf
- Supplemental Table.xlsx
