# Supplementary material
Source: Preprints.org preprint supplement (doi:10.20944/preprints202003.0191.v1)
Supplement: Supplementary file 2 [file supplementary › Supplemental Table.xlsx]

## Sheet: Table 1
Supplementary Table 1. All eQTLs in ACE2 TSS-10kb to TTS+10kb associated with ACE2 expression (p<0.01)
Pos	SNP	Ref	Alt	eQTL(pvalue,NES,tissue)	EAS-EUR	EAS-AFR	AMR_AF	AFR_AF	EUR_AF	SAS_AF	EAS_AF	Distance to AR/ER motif within +/-300bp	Distance to TF cluster within +/-1Kbp
15553774	rs145376384	G	C	0.0014,-1.2,Colon - Sigmoid	0	-0.0947	0.0095	0.0947	0	0	0	+76 ESR2_7|+45 ESR2_12	-
15554352	rs62578917	T	A	0.0083,0.86,Brain - Frontal Cortex (BA9)	-0.0117	0	0.0038	0	0.0117	0.0014	0	-	-
15554552	rs233573	T	C	0.0014,-0.67,Colon - Sigmoid	-0.0144	-0.0947	0.0115	0.0947	0.0144	0.0153	0	-	-
15555645	rs2873356	A	C	4.2e-06,0.41,Brain - Substantia nigra|5e-05,0.29,Brain - Caudate (basal ganglia)|0.00015,0.13,Nerve - Tibial|0.00048,0.29,Brain - Anterior cingulate cortex (BA24)|0.00079,0.27,Brain - Frontal Cortex (BA9)|0.0019,0.24,Brain - Cerebellum|0.0019,0.26,Brain - Cortex	0.3434	0.3032	0.7481	0.6929	0.6527	0.8008	0.9961	-199 AR_13	-161 TF_cluster_5
15557256	rs1132186	A	C	1.6e-06,0.41,Brain - Substantia nigra|3.2e-05,0.28,Brain - Caudate (basal ganglia)|7.2e-05,0.29,Brain - Nucleus accumbens (basal ganglia)|0.0001,0.13,Nerve - Tibial|0.00038,0.29,Brain - Anterior cingulate cortex (BA24)|0.00065,0.26,Brain - Frontal Cortex (BA9)|0.00099,0.25,Brain - Cerebellum|0.0011,0.26,Brain - Cortex|0.005,0.11,Artery - Tibial|0.0087,0.23,Brain - Putamen (basal ganglia)	0.3146	0.4878	0.7156	0.4756	0.6488	0.7145	0.9634	+172 AR_24	-
15558292	rs35482260	GT	G	2.9e-06,0.33,Brain - Caudate (basal ganglia)|8.8e-05,0.29,Brain - Nucleus accumbens (basal ganglia)|0.0001,0.33,Brain - Anterior cingulate cortex (BA24)|0.00028,0.13,Nerve - Tibial|0.0013,0.13,Artery - Tibial|0.0019,0.26,Brain - Frontal Cortex (BA9)|0.0022,0.26,Brain - Cortex|0.0062,0.21,Brain - Cerebellum|0.0089,0.24,Brain - Putamen (basal ganglia)	-0.0026	-0.0229	0,0.7195	0.0229,0.4726	0.0026,0.6475	0,0.7145	0,0.9594	+202 AR_18|-68 ESR2_3|-65 ESR1_5	-
15558483	rs4830542	C	T	1.7e-05,0.3,Brain - Caudate (basal ganglia)|1.8e-05,0.37,Brain - Substantia nigra|0.00028,0.3,Brain - Anterior cingulate cortex (BA24)|0.0004,0.12,Nerve - Tibial|0.00067,0.13,Artery - Tibial|0.00094,0.26,Brain - Frontal Cortex (BA9)|0.0011,0.26,Brain - Cortex|0.0016,0.24,Brain - Cerebellum|0.0054,0.24,Brain - Putamen (basal ganglia)	0.3146	0.5058	0.7195	0.4576	0.6488	0.7159	0.9634	+123 ESR2_3|+125 ESR1_5	-
15564624	rs1514283	T	C	0.0072,0.43,Adrenal Gland	0.0301	-0.2774	0.0267	0.3101	0.0026	0.085	0.0327	-	-
15564640	rs1514282	T	C	0.0072,0.43,Adrenal Gland	0.0301	-0.2834	0.0324	0.3161	0.0026	0.085	0.0327	-	-
15564663	rs1514281	T	C	0.0059,0.45,Adrenal Gland	0.0301	-0.2774	0.0267	0.3101	0.0026	0.085	0.0327	-	-
15564667	rs2074192	C	T	LVH|0.0015,0.28,Brain - Substantia nigra	0.0024	0.082	0.3989	0.346	0.4256	0.2256	0.428	-	-
15564843	rs233575	G	A	3.1e-06,0.35,Brain - Caudate (basal ganglia)|9.4e-05,0.37,Brain - Substantia nigra|0.00016,0.14,Nerve - Tibial|0.00024,0.31,Brain - Frontal Cortex (BA9)|0.00025,0.29,Brain - Nucleus accumbens (basal ganglia)|0.00043,0.31,Brain - Anterior cingulate cortex (BA24)|0.0007,0.14,Artery - Tibial|0.0012,0.26,Brain - Cerebellum|0.0023,0.27,Brain - Cortex|0.0035,0.22,Brain - Hypothalamus|0.0044,0.26,Brain …	0.3316	0.0081	0.7863	0.988	0.6645	0.8162	0.9961	-169 AR_17|-242 ESR2_11	-
15565666	rs4646184	G	A	0.0014,-1.2,Colon - Sigmoid	0	-0.0947	0.0095	0.0947	0	0	0	-	-
15565781	rs714205	C	G	8.1e-06,0.42,Brain - Nucleus accumbens (basal ganglia)|9e-05,0.34,Brain - Caudate (basal ganglia)|0.00062,0.33,Brain - Hypothalamus|0.0024,0.33,Brain - Frontal Cortex (BA9)|0.0025,0.33,Brain - Amygdala|0.0045,0.28,Brain - Cortex|0.0094,0.27,Brain - Putamen (basal ganglia)	0.3303	0.4346	0.3034	0.1007	0.205	0.4708	0.5353	-	-
15565981	rs4646182	T	C	0.0014,-1.2,Colon - Sigmoid	0	-0.0947	0.0095	0.0947	0	0	0	-	-
15568325	rs1514280	A	G	6.2e-06,0.33,Brain - Caudate (basal ganglia)|6.6e-06,0.4,Brain - Substantia nigra|4.6e-05,0.14,Nerve - Tibial|0.00022,0.28,Brain - Nucleus accumbens (basal ganglia)|0.00055,0.29,Brain - Anterior cingulate cortex (BA24)|0.00069,0.29,Brain - Cortex|0.0009,0.27,Brain - Frontal Cortex (BA9)|0.0012,0.26,Brain - Cerebellum|0.0025,0.23,Brain - Hypothalamus|0.0068,0.19,Pituitary|0.0091,0.24,Brain - Putam…	0.3407	0.2045	0.7538	0.7916	0.6554	0.8022	0.9961	-44 AR_9	+550 TF_cluster_4
15568841	rs4240157	C	T	1.7e-05,0.3,Brain - Caudate (basal ganglia)|1.8e-05,0.37,Brain - Substantia nigra|0.00013,0.28,Brain - Nucleus accumbens (basal ganglia)|0.00028,0.3,Brain - Anterior cingulate cortex (BA24)|0.00045,0.12,Nerve - Tibial|0.00061,0.13,Artery - Tibial|0.00094,0.26,Brain - Frontal Cortex (BA9)|0.0011,0.26,Brain - Cortex|0.0016,0.24,Brain - Cerebellum|0.0029,0.22,Brain - Hypothalamus|0.0051,0.19,Pituita…	0.3224	0.5068	0.7195	0.4566	0.641	0.7145	0.9634	-	-
15569381	rs4646176	C	G	0.0098,-0.26,Adipose - Visceral (Omentum)	0.0314	-0.1318	0.0191	0.1645	0.0013	0.085	0.0327	-	-
15569856	rs4646175	T	C	0.0014,-1.2,Colon - Sigmoid	0	-0.0578	0.0057	0.0578	0	0	0	-	-
15570148	rs4646174	C	G	3.7e-06,0.41,Brain - Substantia nigra|8.4e-06,0.31,Brain - Caudate (basal ganglia)|2e-05,0.14,Nerve - Tibial|7e-05,0.29,Brain - Nucleus accumbens (basal ganglia)	0.3146	0.5098	0.7214	0.4536	0.6488	0.7145	0.9634	-	-
15570905	rs4646171	T	C	0.0098,-0.26,Adipose - Visceral (Omentum)	0.0314	-0.1348	0.0191	0.1675	0.0013	0.085	0.0327	-	-
15572684	rs879922	C	G	1.1e-05,0.3,Brain - Caudate (basal ganglia)|1.8e-05,0.37,Brain - Substantia nigra|7e-05,0.13,Nerve - Tibial	0.3172	0.5098	0.7195	0.4536	0.6462	0.7145	0.9634	-213 AR_21	-
15578020	rs4646158	C	CATAAG	4.5e-09,0.21,Nerve - Tibial|4.2e-08,0.39,Brain - Caudate (basal ganglia)|2.2e-07,0.43,Brain - Cortex|2.9e-07,0.41,Brain - Frontal Cortex (BA9)|5.7e-07,0.43,Brain - Anterior cingulate cortex (BA24)|1.6e-06,0.37,Brain - Nucleus accumbens (basal ganglia)|1.9e-06,0.43,Brain - Substantia nigra|3e-05,0.31,Brain - Hypothalamus|3.4e-05,0.29,Pituitary|4.1e-05,0.11,Adipose - Subcutaneous|0.00012,0.31,Brain…	-	-	-	-	-	-	-	-	-218 TF_cluster_3
15578920	rs4646156	A	T	4e-09,0.2,Nerve - Tibial|4.9e-07,0.43,Brain - Anterior cingulate cortex (BA24)|5.5e-07,0.39,Brain - Frontal Cortex (BA9)|8.9e-07,0.34,Brain - Caudate (basal ganglia)|2.4e-06,0.41,Brain - Substantia nigra|3.1e-06,0.35,Brain - Nucleus accumbens (basal ganglia)|3.2e-06,0.37,Brain - Cortex|1.1e-05,0.32,Brain - Hypothalamus|3.4e-05,0.1,Adipose - Subcutaneous|4.2e-05,0.16,Artery - Tibial|6.3e-05,0.28,P…	0.3421	0.1899	0.7519	0.8036	0.6514	0.7967	0.9935	-	+681 TF_cluster_3
15579445	rs4646190	A	G	0.0027,-0.31,Thyroid|0.0031,-0.94,Brain - Frontal Cortex (BA9)	-0.0287	-0.001	0.0095	0.001	0.0287	0.0028	0	+178 ESR2_15	-
15579712	rs4646153	C	T	1.6e-08,0.2,Nerve - Tibial|9.3e-08,0.38,Brain - Caudate (basal ganglia)|3.7e-07,0.43,Brain - Anterior cingulate cortex (BA24)|1.3e-06,0.4,Brain - Cortex|1.5e-06,0.38,Brain - Frontal Cortex (BA9)|1.5e-05,0.38,Brain - Substantia nigra|1.6e-05,0.33,Brain - Nucleus accumbens (basal ganglia)|2e-05,0.3,Pituitary|0.00011,0.16,Artery - Tibial|0.0002,0.096,Adipose - Subcutaneous|0.00056,0.31,Brain - Putam…	0.3447	0.0842	0.7557	0.9093	0.6488	0.8022	0.9935	-	-
15579901	rs4646152	A	G	1.6e-08,0.2,Nerve - Tibial|9.3e-08,0.38,Brain - Caudate (basal ganglia)|3.7e-07,0.43,Brain - Anterior cingulate cortex (BA24)|1.3e-06,0.4,Brain - Cortex|1.5e-06,0.38,Brain - Frontal Cortex (BA9)|1.5e-05,0.38,Brain - Substantia nigra|1.6e-05,0.33,Brain - Nucleus accumbens (basal ganglia)|2e-05,0.3,Pituitary|0.00011,0.16,Artery - Tibial|0.0002,0.096,Adipose - Subcutaneous|0.00056,0.31,Brain - Putam…	0.3421	0.0842	0.7557	0.9093	0.6514	0.8022	0.9935	-	-
15581769	rs4646148	T	TTTAA	2.5e-09,0.21,Nerve - Tibial|3.7e-07,0.35,Brain - Caudate (basal ganglia)|5.8e-07,0.4,Brain - Frontal Cortex (BA9)|7.9e-07,0.4,Brain - Cortex|1.7e-06,0.4,Brain - Anterior cingulate cortex (BA24)|3.9e-06,0.41,Brain - Substantia nigra|5.4e-06,0.35,Brain - Nucleus accumbens (basal ganglia)|2e-05,0.29,Pituitary|3e-05,0.31,Brain - Hypothalamus|5.2e-05,0.1,Adipose - Subcutaneous|0.00012,0.15,Artery - Ti…	0.3408	0.1012	0.7576	0.8923	0.6527	0.8022	0.9935	-	-
15582092	rs2048684	A	C	1.6e-08,0.2,Nerve - Tibial|9.3e-08,0.38,Brain - Caudate (basal ganglia)|3.7e-07,0.43,Brain - Anterior cingulate cortex (BA24)|1.3e-06,0.4,Brain - Cortex|1.5e-06,0.38,Brain - Frontal Cortex (BA9)|1.5e-05,0.38,Brain - Substantia nigra|1.6e-05,0.33,Brain - Nucleus accumbens (basal ganglia)|2e-05,0.3,Pituitary|0.00011,0.16,Artery - Tibial|0.0002,0.096,Adipose - Subcutaneous|0.00056,0.31,Brain - Putam…	0.3421	0.0842	0.7557	0.9093	0.6514	0.8022	0.9935	-	-
15582568	rs2316904	C	T	8.6e-09,0.2,Nerve - Tibial|9.3e-08,0.38,Brain - Caudate (basal ganglia)|3.7e-07,0.43,Brain - Anterior cingulate cortex (BA24)|1.3e-06,0.4,Brain - Cortex|1.5e-06,0.38,Brain - Frontal Cortex (BA9)|1.5e-05,0.38,Brain - Substantia nigra|1.6e-05,0.33,Brain - Nucleus accumbens (basal ganglia)|2e-05,0.3,Pituitary|5.2e-05,0.16,Artery - Tibial|0.00022,0.095,Adipose - Subcutaneous|0.00056,0.31,Brain - Puta…	0.3434	0.1012	0.7557	0.8923	0.6501	0.8022	0.9935	-37 AR_22	-
15582621	rs4646147	T	A	8.6e-09,0.2,Nerve - Tibial|9.3e-08,0.38,Brain - Caudate (basal ganglia)|3.7e-07,0.43,Brain - Anterior cingulate cortex (BA24)|1.3e-06,0.4,Brain - Cortex|1.5e-06,0.38,Brain - Frontal Cortex (BA9)|1.5e-05,0.38,Brain - Substantia nigra|1.6e-05,0.33,Brain - Nucleus accumbens (basal ganglia)|2e-05,0.3,Pituitary|5.2e-05,0.16,Artery - Tibial|0.00022,0.095,Adipose - Subcutaneous|0.00056,0.31,Brain - Puta…	0.3421	0.1012	0.7557	0.8923	0.6514	0.8036	0.9935	+16 AR_22	-
15582756	rs11394305	C	CA	8.6e-09,0.2,Nerve - Tibial|9.3e-08,0.38,Brain - Caudate (basal ganglia)|3.7e-07,0.43,Brain - Anterior cingulate cortex (BA24)|1.3e-06,0.4,Brain - Cortex|1.5e-06,0.38,Brain - Frontal Cortex (BA9)|1.5e-05,0.38,Brain - Substantia nigra|1.6e-05,0.33,Brain - Nucleus accumbens (basal ganglia)|2e-05,0.3,Pituitary|5.2e-05,0.16,Artery - Tibial|0.00022,0.095,Adipose - Subcutaneous	0.3368	0.0963	0.75,0	0.8893,0.002	0.6488,0	0.8008,0	0.9856,0.0026	+151 AR_22	-
15583151	rs2316903	G	T	8.6e-09,0.2,Nerve - Tibial|9.3e-08,0.38,Brain - Caudate (basal ganglia)|3.7e-07,0.43,Brain - Anterior cingulate cortex (BA24)|1.3e-06,0.4,Brain - Cortex|1.5e-06,0.38,Brain - Frontal Cortex (BA9)|1.5e-05,0.38,Brain - Substantia nigra|1.6e-05,0.33,Brain - Nucleus accumbens (basal ganglia)|2e-05,0.3,Pituitary|5.2e-05,0.16,Artery - Tibial|0.00022,0.095,Adipose - Subcutaneous|0.00056,0.31,Brain - Puta…	0.3421	0.1012	0.7557	0.8923	0.6514	0.8022	0.9935	-122 AR_10	-
15583220	rs4646188	A	G	8.5e-05,0.18,Nerve - Tibial|0.0056,0.43,Brain - Spinal cord (cervical c-1)|0.0072,0.32,Brain - Frontal Cortex (BA9)|0.0097,0.27,Brain - Cortex	-0.1305	-0.002	0.0344	0.002	0.1305	0.0627	0	-53 AR_10	-
15584941	rs4646142	G	C	5.5e-07,0.44,Brain - Nucleus accumbens (basal ganglia)|1.3e-05,0.42,Brain - Frontal Cortex (BA9)|1.6e-05,0.37,Brain - Hypothalamus|3.7e-05,0.38,Brain - Cortex|4.9e-05,0.16,Nerve - Tibial|0.0012,0.31,Brain - Putamen (basal ganglia)	0.3004	0.2977	0.3359	0.2403	0.2376	0.4791	0.538	-	-
15586742	rs1514279	G	A	1.3e-08,0.2,Nerve - Tibial|3.1e-07,0.44,Brain - Anterior cingulate cortex (BA24)|1.1e-06,0.34,Brain - Caudate (basal ganglia)|1.4e-06,0.38,Brain - Frontal Cortex (BA9)|6e-06,0.37,Brain - Cortex|9.6e-06,0.39,Brain - Substantia nigra|9.9e-06,0.33,Brain - Nucleus accumbens (basal ganglia)|2.3e-05,0.17,Artery - Tibial|2.9e-05,0.3,Brain - Hypothalamus|3.9e-05,0.29,Pituitary|0.00015,0.096,Adipose - Sub…	0.3473	0.1869	0.75	0.8066	0.6462	0.8022	0.9935	-	-
15589527	rs971249	T	C	1e-08,0.2,Nerve - Tibial|2.8e-07,0.44,Brain - Anterior cingulate cortex (BA24)|1.7e-06,0.38,Brain - Frontal Cortex (BA9)|1.8e-06,0.33,Brain - Caudate (basal ganglia)|2.7e-06,0.35,Brain - Nucleus accumbens (basal ganglia)|2.7e-06,0.38,Brain - Cortex|4.8e-06,0.4,Brain - Substantia nigra|2.4e-05,0.31,Brain - Hypothalamus|3e-05,0.17,Artery - Tibial|5.6e-05,0.28,Pituitary|0.00016,0.096,Adipose - Subcu…	0.346	0.1869	0.7481	0.8066	0.6475	0.8022	0.9935	-	-
15590263	rs2158083	C	T	1.9e-08,0.19,Nerve - Tibial|2.8e-07,0.44,Brain - Anterior cingulate cortex (BA24)|1.7e-06,0.38,Brain - Frontal Cortex (BA9)|1.8e-06,0.33,Brain - Caudate (basal ganglia)|2.7e-06,0.35,Brain - Nucleus accumbens (basal ganglia)|2.7e-06,0.38,Brain - Cortex|4.8e-06,0.4,Brain - Substantia nigra|2.4e-05,0.31,Brain - Hypothalamus|5.6e-05,0.28,Pituitary|7.3e-05,0.16,Artery - Tibial|0.00014,0.096,Adipose - …	0.346	0.17	0.7519	0.8235	0.6475	0.8022	0.9935	-	-
15590376	rs2048683	T	G	8.5e-09,0.2,Nerve - Tibial|2.8e-07,0.44,Brain - Anterior cingulate cortex (BA24)|1.7e-06,0.38,Brain - Frontal Cortex (BA9)|1.8e-06,0.33,Brain - Caudate (basal ganglia)|2.7e-06,0.35,Brain - Nucleus accumbens (basal ganglia)|2.7e-06,0.38,Brain - Cortex|4.8e-06,0.4,Brain - Substantia nigra|2.4e-05,0.31,Brain - Hypothalamus|3.1e-05,0.16,Artery - Tibial|5.6e-05,0.28,Pituitary|0.00016,0.096,Adipose - S…	0.346	0.1869	0.75	0.8066	0.6475	0.8022	0.9935	-	-
15590829	rs757066	C	T	1.2e-08,0.2,Nerve - Tibial|6.4e-08,0.39,Brain - Caudate (basal ganglia)|1e-07,0.44,Brain - Cortex|2.8e-07,0.44,Brain - Anterior cingulate cortex (BA24)|9.5e-07,0.39,Brain - Frontal Cortex (BA9)|1.2e-06,0.37,Brain - Nucleus accumbens (basal ganglia)|2.7e-06,0.42,Brain - Substantia nigra|2.9e-05,0.29,Pituitary|6.4e-05,0.3,Brain - Hypothalamus|0.00011,0.35,Brain - Putamen (basal ganglia)|0.00013,0.1…	0.3447	0.0055	0.7824	0.988	0.6488	0.8022	0.9935	-	-
15592225	rs756737634	C	CT	5.5e-07,0.44,Brain - Nucleus accumbens (basal ganglia)|1.5e-05,0.37,Brain - Hypothalamus|1.6e-05,0.17,Nerve - Tibial|3.2e-05,0.41,Brain - Frontal Cortex (BA9)|3.7e-05,0.38,Brain - Cortex|5.9e-05,0.33,Brain - Caudate (basal ganglia)	-	-	-	-	-	-	-	-	-847 TF_cluster_2
15594320	rs397686765	GA	G	3.3e-09,0.2,Nerve - Tibial|4.9e-07,0.43,Brain - Anterior cingulate cortex (BA24)|5.5e-07,0.39,Brain - Frontal Cortex (BA9)|8.9e-07,0.34,Brain - Caudate (basal ganglia)|2.4e-06,0.41,Brain - Substantia nigra|3.1e-06,0.35,Brain - Nucleus accumbens (basal ganglia)|3.2e-06,0.37,Brain - Cortex|1.1e-05,0.32,Brain - Hypothalamus|3.4e-05,0.1,Adipose - Subcutaneous|4.3e-05,0.16,Artery - Tibial|6.3e-05,0.28…	-	-	-	-	-	-	-	-	-
15596022	rs2023802	G	A	4e-09,0.2,Nerve - Tibial|4.9e-07,0.43,Brain - Anterior cingulate cortex (BA24)|5.5e-07,0.39,Brain - Frontal Cortex (BA9)|8.9e-07,0.34,Brain - Caudate (basal ganglia)|2.4e-06,0.41,Brain - Substantia nigra|3.1e-06,0.35,Brain - Nucleus accumbens (basal ganglia)|3.2e-06,0.37,Brain - Cortex|1.1e-05,0.32,Brain - Hypothalamus|3.4e-05,0.1,Adipose - Subcutaneous|4.2e-05,0.16,Artery - Tibial|6.3e-05,0.28,P…	0.3421	0.1879	0.7519	0.8056	0.6514	0.8022	0.9935	-	-
15596540	rs397822493	G	GT	4.5e-09,0.21,Nerve - Tibial|4.2e-08,0.39,Brain - Caudate (basal ganglia)|2.2e-07,0.43,Brain - Cortex|2.9e-07,0.41,Brain - Frontal Cortex (BA9)|5.7e-07,0.43,Brain - Anterior cingulate cortex (BA24)|1.6e-06,0.37,Brain - Nucleus accumbens (basal ganglia)|1.9e-06,0.43,Brain - Substantia nigra|3e-05,0.31,Brain - Hypothalamus|3.4e-05,0.29,Pituitary|4.1e-05,0.11,Adipose - Subcutaneous|0.00012,0.31,Brain…	0.3408	0.0772	0.7653	0.9163	0.6527	0.8022	0.9935	-	-
15597330	rs4646127	A	G	7.5e-09,0.2,Nerve - Tibial|4.9e-07,0.43,Brain - Anterior cingulate cortex (BA24)|5.5e-07,0.39,Brain - Frontal Cortex (BA9)|8.9e-07,0.34,Brain - Caudate (basal ganglia)|2.4e-06,0.41,Brain - Substantia nigra|3.1e-06,0.35,Brain - Nucleus accumbens (basal ganglia)|3.2e-06,0.37,Brain - Cortex|1.1e-05,0.32,Brain - Hypothalamus|3.1e-05,0.11,Adipose - Subcutaneous|6.3e-05,0.28,Pituitary|8.9e-05,0.16,Arte…	0.3421	0.17	0.7538	0.8235	0.6514	0.8022	0.9935	-	-
15597980	rs60097061	C	CA	7.5e-09,0.2,Nerve - Tibial|4.9e-07,0.43,Brain - Anterior cingulate cortex (BA24)|5.5e-07,0.39,Brain - Frontal Cortex (BA9)|8.9e-07,0.34,Brain - Caudate (basal ganglia)|2.4e-06,0.41,Brain - Substantia nigra|3.1e-06,0.35,Brain - Nucleus accumbens (basal ganglia)|3.2e-06,0.37,Brain - Cortex|1.1e-05,0.32,Brain - Hypothalamus|3.1e-05,0.11,Adipose - Subcutaneous|6.3e-05,0.28,Pituitary|8.9e-05,0.16,Arte…	-	-	-	-	-	-	-	-	-
15598630	rs754020501	CTATTAAAA	C	0.0095,-0.58,Brain - Anterior cingulate cortex (BA24)	-	-	-	-	-	-	-	+33 ESR1_6|+258 AR_3	-
15598673	rs4646124	T	C	4e-09,0.2,Nerve - Tibial|4.9e-07,0.43,Brain - Anterior cingulate cortex (BA24)|5.5e-07,0.39,Brain - Frontal Cortex (BA9)|8.9e-07,0.34,Brain - Caudate (basal ganglia)|2.4e-06,0.41,Brain - Substantia nigra|3.1e-06,0.35,Brain - Nucleus accumbens (basal ganglia)|3.2e-06,0.37,Brain - Cortex|1.1e-05,0.32,Brain - Hypothalamus|3.4e-05,0.1,Adipose - Subcutaneous|4.2e-05,0.16,Artery - Tibial|6.3e-05,0.28,P…	0.3421	0.1899	0.7519	0.8036	0.6514	0.8022	0.9935	+76 ESR1_6	-
15599178	rs4646123	C	T	0.0019,-0.92,Colon - Sigmoid	0	-0.1107	0.0095	0.1107	0	0	0	-165 ESR1_8|-168 ESR2_9	-
15599613	rs4646120	G	A	2.9e-14,0.25,Nerve - Tibial|6.1e-13,0.53,Brain - Nucleus accumbens (basal ganglia)|1.3e-12,0.53,Brain - Cortex|1.6e-12,0.53,Brain - Frontal Cortex (BA9)|1.6e-08,0.21,Artery - Tibial|8.6e-08,0.4,Brain - Cerebellum|1.2e-07,0.38,Brain - Caudate (basal ganglia)|2.9e-07,0.43,Brain - Anterior cingulate cortex (BA24)|5.5e-06,0.39,Brain - Substantia nigra|9.3e-06,0.37,Brain - Putamen (basal ganglia)|1e-0…	0.4661	0.3046	0.6889	0.6889	0.5274	0.7813	0.9935	-26 ESR1_12|+269 ESR1_8|+267 ESR2_9	-
15599938	rs2106809	A	G	LVH|6.4e-08,0.22,Nerve - Tibial|1.1e-06,0.45,Brain - Nucleus accumbens (basal ganglia)|3.1e-06,0.41,Brain - Hypothalamus|4.8e-06,0.48,Brain - Frontal Cortex (BA9)|1.4e-05,0.43,Brain - Cortex|2.4e-05,0.45,Brain - Amygdala|0.001,0.27,Pituitary|0.0011,0.29,Brain - Caudate (basal ganglia)|0.0011,0.32,Brain - Putamen (basal ganglia)|0.0012,0.15,Artery - Tibial|0.0021,0.31,Brain - Cerebellar Hemisphere…	0.2756	0.4336	0.3244	0.0887	0.2467	0.4833	0.5223	+298 ESR1_12|-275 ESR2_4	-
15599940	rs1978124	T	C	9.5e-17,0.28,Nerve - Tibial|1.5e-15,0.62,Brain - Cortex|1.9e-15,0.6,Brain - Nucleus accumbens (basal ganglia)|1.2e-14,0.59,Brain - Frontal Cortex (BA9)|1.9e-09,0.44,Brain - Caudate (basal ganglia)|1.3e-08,0.44,Brain - Cerebellum|3.5e-08,0.47,Brain - Putamen (basal ganglia)|3.6e-08,0.21,Artery - Tibial|2e-07,0.43,Brain - Anterior cingulate cortex (BA24)|4.1e-06,0.34,Brain - Hypothalamus|6.6e-06,0.…	0.4648	0.0932	0.7099	0.9003	0.5287	0.7813	0.9935	-273 ESR2_4	-
15600285	rs4646118	C	T	0.0014,-1.2,Colon - Sigmoid	0	-0.0987	0.0095	0.0987	0	0	0	+72 ESR2_4|+13 ESR1_11	-
15601753	rs185721534	A	G	0.0014,-1.2,Colon - Sigmoid	0	-0.0987	0.0095	0.0987	0	0	0	-23 ESR1_15	-
15602177	rs147718775	C	G	0.0099,0.22,Esophagus - Mucosa	-0.0131	0	0.0115	0	0.0131	0	0	+52 AR_14|-102 ESR2_8	-610 TF_cluster_1
15602178	rs140394675	A	G	0.0099,0.22,Esophagus - Mucosa	-0.0131	0	0.0115	0	0.0131	0	0	+53 AR_14|-101 ESR2_8	-609 TF_cluster_1
15607856	rs138813533	G	A	0.0014,-1.2,Colon - Sigmoid	0	-0.0997	0.0095	0.0997	0	0	0	-	-
15607860	rs5934250	T	G	1.5e-16,0.28,Nerve - Tibial|8.8e-16,0.63,Brain - Cortex|8.3e-15,0.59,Brain - Nucleus accumbens (basal ganglia)|3.6e-14,0.58,Brain - Frontal Cortex (BA9)|6.3e-10,0.45,Brain - Caudate (basal ganglia)|2.1e-08,0.43,Brain - Cerebellum|2.2e-08,0.48,Brain - Putamen (basal ganglia)|6.4e-08,0.21,Artery - Tibial|2.4e-07,0.43,Brain - Anterior cingulate cortex (BA24)|2e-06,0.35,Brain - Hypothalamus|4.7e-06,0…	0.4622	0.0932	0.7099	0.9003	0.5313	0.7799	0.9935	-	-
15608221	rs141945167	T	G	0.0014,-1.2,Colon - Sigmoid	0	-0.0997	0.0095	0.0997	0	0	0	-	-
15610161	rs185248824	T	C	0.0012,0.53,Brain - Cortex|0.0083,0.45,Brain - Caudate (basal ganglia)	-0.0653	-0.005	0.0153	0.005	0.0653	0.0265	0	-	-
15610716	rs144934578	G	T	0.0014,-1.2,Colon - Sigmoid	0	-0.0997	0.0095	0.0997	0	0	0	+188 AR_6	-
15611109	rs149071726	C	G	0.0014,-1.2,Colon - Sigmoid	0	-0.0997	0.0095	0.0997	0	0	0	-	-
15611190	rs199688052	TCTC	T	0.0014,-1.2,Colon - Sigmoid	0	-0.0997	0.0095	0.0997	0	0	0	-	-
15611310	rs200599510	AT	A	0.0014,-1.2,Colon - Sigmoid	0	-0.0987	0.0095	0.0987	0	0	0	-	-
15611313	rs766474171	T	G	0.0014,-1.2,Colon - Sigmoid	-	-	-	-	-	-	-	-	-
15611318	rs202197099	T	TC	6.9e-05,0.36,Brain - Frontal Cortex (BA9)|0.0001,0.14,Nerve - Tibial	-	-	-	-	-	-	-	-	-
15611329	rs182288080	C	G	0.0014,-1.2,Colon - Sigmoid	0	-0.0997	0.0095	0.0997	0	0	0	-	-
* Yellow highlights the eQTLs with AF difference between EAS and EUR > 0.3, green between EAS and AFR > 0.3

## Sheet: Table 2
Supplementary Table 2. Genes that significant negatively co-express with ACE2 (PCC<-0.3) in at least 5 tissues
Gene	gene_name	annotations	ContainKRAB	Adipose.Tissue	Blood.Vessel	Breast	Colon	Esophagus	Heart	Kidney	Lung	Muscle	Nerve	Ovary	Pancreas	Prostate	Salivary.Gland	Small.Intestine	Testis	Uterus	Vagina
COL1A1	collagen type I alpha 1 chain	Human papillomavirus infection	FALSE	-0.345	-0.358		-0.31							-0.333	0.39			-0.612
COL9A3	collagen type IX alpha 3 chain	Human papillomavirus infection	FALSE		0.367		-0.327		-0.313			0.377		0.332				-0.625	-0.621	0.534
CREB3	cAMP responsive element binding protein 3	Human papillomavirus infection	FALSE		-0.42					0.312					0.309	-0.618		-0.557	-0.644
DVL2	dishevelled segment polarity protein 2	Human papillomavirus infection	FALSE	-0.34	-0.342	-0.422	-0.312			0.302			-0.44			-0.401		-0.631	0.496	-0.475
PARD6G	par-6 family cell polarity regulator gamma	Human papillomavirus infection	FALSE			-0.395								-0.317	0.359	-0.789	-0.385	-0.69	0.396
PRKCZ	protein kinase C zeta	Human papillomavirus infection	FALSE		0.312	-0.35	0.425			0.485	-0.302			-0.402		-0.418		0.787	-0.554
THBS3	thrombospondin 3	Human papillomavirus infection	FALSE			-0.367				0.389			-0.343			0.317		-0.676	-0.554	-0.536
TNXB	tenascin XB	Human papillomavirus infection	FALSE					0.355	-0.307					-0.422			-0.304	-0.517
TYK2	tyrosine kinase 2	Human papillomavirus infection	FALSE			-0.387				0.327	-0.334		-0.435	-0.32	0.318				0.46	-0.456
WNT5B	Wnt family member 5B	Human papillomavirus infection	FALSE			-0.301								-0.378		-0.847		-0.578	0.34
EIF2B4	eukaryotic translation initiation factor 2B subunit delta	Herpes simplex virus 1 infection	FALSE							0.328			-0.303			-0.633		-0.705	-0.596
POU2F2	POU class 2 homeobox 2	Herpes simplex virus 1 infection	FALSE			-0.314							-0.363		0.367			-0.309	-0.352
SRSF7	serine and arginine rich splicing factor 7	Herpes simplex virus 1 infection	FALSE				-0.3							-0.368	0.323	-0.734		-0.499	0.321
TYK2	tyrosine kinase 2	Herpes simplex virus 1 infection	FALSE			-0.387				0.327	-0.334		-0.435	-0.32	0.318				0.46	-0.456
ZNF135	zinc finger protein 135	Herpes simplex virus 1 infection	TRUE			-0.361	-0.318					0.386	-0.303	-0.395	0.376			-0.756
ZNF222	zinc finger protein 222	Herpes simplex virus 1 infection	TRUE											-0.379	0.427	-0.447		-0.585	-0.401	0.372
ZNF256	zinc finger protein 256	Herpes simplex virus 1 infection	TRUE											-0.367			-0.443	-0.544	0.529	-0.606
ZNF273	zinc finger protein 273	Herpes simplex virus 1 infection	TRUE			-0.356	-0.303											-0.692	-0.463
ZNF285	zinc finger protein 285	Herpes simplex virus 1 infection	TRUE										-0.337	-0.372	0.349	-0.622		-0.693		-0.357
ZNF433	zinc finger protein 433	Herpes simplex virus 1 infection	TRUE			-0.349								-0.324	0.392			-0.717	-0.542
ZNF517	zinc finger protein 517	Herpes simplex virus 1 infection	TRUE			-0.393							-0.397	-0.307	0.318			-0.557		-0.307
ZNF519	zinc finger protein 519	Herpes simplex virus 1 infection	TRUE	-0.332		-0.358	-0.307						-0.368		0.327			-0.734	0.388	-0.508
ZNF529	zinc finger protein 529	Herpes simplex virus 1 infection	TRUE				-0.31						-0.305	-0.349	0.367			-0.579	0.37	-0.382
ZNF543	zinc finger protein 543	Herpes simplex virus 1 infection	TRUE											-0.325	0.401	-0.405		-0.62	-0.341
ZNF544	zinc finger protein 544	Herpes simplex virus 1 infection	TRUE			-0.328				0.319					0.386		-0.388	-0.533	-0.314
ZNF549	zinc finger protein 549	Herpes simplex virus 1 infection	TRUE			-0.369							-0.362	-0.409	0.477	-0.3		-0.554	0.51
ZNF555	zinc finger protein 555	Herpes simplex virus 1 infection	TRUE			-0.346			0.325				-0.301	-0.359	0.315			-0.662	-0.573
ZNF563	zinc finger protein 563	Herpes simplex virus 1 infection	TRUE	-0.32	-0.322	-0.409				0.386								-0.474	-0.474
ZNF607	zinc finger protein 607	Herpes simplex virus 1 infection	TRUE										-0.338	-0.311	0.42			-0.481	-0.491
ZNF610	zinc finger protein 610	Herpes simplex virus 1 infection	TRUE			-0.315								-0.35				-0.687	-0.414
ZNF624	zinc finger protein 624	Herpes simplex virus 1 infection	TRUE	-0.322		-0.317								-0.357	0.516			-0.508
ZNF627	zinc finger protein 627	Herpes simplex virus 1 infection	TRUE		-0.347	-0.403				0.306				-0.436	0.324			-0.568
ZNF662	zinc finger protein 662	Herpes simplex virus 1 infection	TRUE			-0.335							-0.419	-0.417				-0.69	0.517	-0.543
ZNF667	zinc finger protein 667	Herpes simplex virus 1 infection	TRUE			-0.331							-0.314	-0.305	0.418	-0.437		-0.761
ZNF709	zinc finger protein 709	Herpes simplex virus 1 infection	TRUE			-0.361								-0.323	0.437			-0.597	-0.528
ZNF713	zinc finger protein 713	Herpes simplex virus 1 infection	TRUE											-0.464	0.306	-0.453		-0.481	-0.332	0.32
ZNF736	zinc finger protein 736	Herpes simplex virus 1 infection	TRUE			-0.302								-0.32	0.39			-0.409		-0.634
ZNF74	zinc finger protein 74	Herpes simplex virus 1 infection	TRUE			-0.395	-0.348					-0.366	-0.368		0.376	-0.621		-0.666
ZNF763	zinc finger protein 763	Herpes simplex virus 1 infection	TRUE			-0.336						0.401		-0.32					-0.451	0.325	0.345146
ZNF766	zinc finger protein 766	Herpes simplex virus 1 infection	TRUE			-0.312								-0.321	0.408			-0.6	-0.4
ZNF793	zinc finger protein 793	Herpes simplex virus 1 infection	TRUE			-0.348	-0.301							-0.338	0.342			-0.622	0.409
ZNF85	zinc finger protein 85	Herpes simplex virus 1 infection	TRUE											-0.434				-0.483	-0.442
ZNF98	zinc finger protein 98	Herpes simplex virus 1 infection	TRUE			-0.324								-0.328		0.476	-0.32	-0.416
APOBEC3F	apolipoprotein B mRNA editing enzyme catalytic subunit 3F	Human immunodeficiency virus 1 infection	FALSE	-0.308		-0.438				0.341				-0.361	0.367			-0.452	0.705
APOBEC3G	apolipoprotein B mRNA editing enzyme catalytic subunit 3G	Human immunodeficiency virus 1 infection	FALSE	-0.314		-0.424					-0.304			-0.358				-0.493	0.761
GNB5	G protein subunit beta 5	Human immunodeficiency virus 1 infection	FALSE		-0.305	-0.367				0.327		0.344		-0.355	0.448			-0.584	0.73	0.505
GNG8	G protein subunit gamma 8	Human immunodeficiency virus 1 infection	FALSE		-0.419				-0.304		0.367			0.372				-0.604	-0.428	-0.317
MAPK10	mitogen-activated protein kinase 10	Human immunodeficiency virus 1 infection	FALSE						-0.315	0.301				0.35	0.402		-0.361	-0.71	-0.452	-0.328
PAK1	p21 (RAC1) activated kinase 1	Human immunodeficiency virus 1 infection	FALSE		-0.321	-0.382	0.355			0.544			-0.488	-0.598	0.311			0.43
ATF6B	activating transcription factor 6 beta	Human cytomegalovirus infection	FALSE			-0.341					-0.344			-0.329	0.402			-0.374	0.625
CREB3	cAMP responsive element binding protein 3	Human cytomegalovirus infection	FALSE		-0.42					0.312					0.309	-0.618		-0.557	-0.644
GNB5	G protein subunit beta 5	Human cytomegalovirus infection	FALSE		-0.305	-0.367				0.327		0.344		-0.355	0.448			-0.584	0.73	0.505
GNG8	G protein subunit gamma 8	Human cytomegalovirus infection	FALSE		-0.419				-0.304		0.367			0.372				-0.604	-0.428	-0.317
ANAPC2	anaphase promoting complex subunit 2	Human T-cell leukemia virus 1 infection	FALSE			-0.376				0.313	-0.379		-0.305	-0.314		-0.346		-0.361	-0.309	-0.332
ANAPC7	anaphase promoting complex subunit 7	Human T-cell leukemia virus 1 infection	FALSE			-0.332	-0.34			0.304			-0.354		0.377			-0.7		-0.648
ATF6B	activating transcription factor 6 beta	Human T-cell leukemia virus 1 infection	FALSE			-0.341					-0.344			-0.329	0.402			-0.374	0.625
CREB3	cAMP responsive element binding protein 3	Human T-cell leukemia virus 1 infection	FALSE		-0.42					0.312					0.309	-0.618		-0.557	-0.644
MAP3K14	mitogen-activated protein kinase kinase kinase 14	Human T-cell leukemia virus 1 infection	FALSE			-0.409	-0.327								0.333			-0.334	-0.541	-0.504
MAPK10	mitogen-activated protein kinase 10	Human T-cell leukemia virus 1 infection	FALSE						-0.315	0.301				0.35	0.402		-0.361	-0.71	-0.452	-0.328
RANBP3	RAN binding protein 3	Human T-cell leukemia virus 1 infection	FALSE	-0.304	-0.332	-0.429									0.31			-0.665	-0.35	-0.31
MAP3K14	mitogen-activated protein kinase kinase kinase 14	Epstein-Barr virus infection	FALSE			-0.409	-0.327								0.333			-0.334	-0.541	-0.504
MAPK10	mitogen-activated protein kinase 10	Epstein-Barr virus infection	FALSE						-0.315	0.301				0.35	0.402		-0.361	-0.71	-0.452	-0.328
TYK2	tyrosine kinase 2	Epstein-Barr virus infection	FALSE			-0.387				0.327	-0.334		-0.435	-0.32	0.318				0.46	-0.456
GNB5	G protein subunit beta 5	Kaposi sarcoma-associated herpesvirus infection	FALSE		-0.305	-0.367				0.327		0.344		-0.355	0.448			-0.584	0.73	0.505
GNG8	G protein subunit gamma 8	Kaposi sarcoma-associated herpesvirus infection	FALSE		-0.419				-0.304		0.367			0.372				-0.604	-0.428	-0.317
MAPK10	mitogen-activated protein kinase 10	Kaposi sarcoma-associated herpesvirus infection	FALSE						-0.315	0.301				0.35	0.402		-0.361	-0.71	-0.452	-0.328
TYK2	tyrosine kinase 2	Kaposi sarcoma-associated herpesvirus infection	FALSE			-0.387				0.327	-0.334		-0.435	-0.32	0.318				0.46	-0.456

## Sheet: Table 3
Supplementary Table 3. The expression correlations to ACE2 of KRAB-ZNFs that bind ACE2.
Gene	gene_name	Adipose.Tissue	Blood.Vessel	Breast	Colon	Esophagus	Heart	Kidney	Lung	Muscle	Nerve	Ovary	Pancreas	Prostate	Salivary.Gland	Small.Intestine	Testis	Uterus	Vagina
ZKSCAN1	zinc finger with KRAB and SCAN domains 1							0.406			-0.337		0.386	-0.394			0.649
ZNF282	zinc finger protein 282			-0.348							-0.444			-0.485		-0.35
ZNF316	zinc finger protein 316										-0.482		0.319	-0.479		-0.512
